# Supplementary material
Source: publisher figshare collection journal article supplement (https://wiley.figshare.com/ndownloader/files/5644653)
Supplement: Supplementary file 1 [file 5644653]

id	main_seed	name	distribution	transformation	distance	dispersion	p	g	nsim	nperm.pam	nperm.d	seed	n_1	n_2	N	Delta	method	t1	t1.lb	t1.ub
1	19826	Ekofisk_B-C_nb.l1.eu.dv	negbin	loge1	euclidean	varies	173	2	1000	999	999	639561742	12	10	22	0	PERMANOVA	0.048	0.0359600080383936	0.0636285845165773
2	19826	Ekofisk_B-C_nb.l1.eu.dv	negbin	loge1	euclidean	varies	173	2	1000	999	999	367534028	12	10	22	0.1	PERMANOVA	0.073	0.0580113652070019	0.0913573223187132
3	19826	Ekofisk_B-C_nb.l1.eu.dv	negbin	loge1	euclidean	varies	173	2	1000	999	999	450236819	12	10	22	0.2	PERMANOVA	0.165	0.142814396177631	0.189805062930121
4	19826	Ekofisk_B-C_nb.l1.eu.dv	negbin	loge1	euclidean	varies	173	2	1000	999	999	717045863	12	10	22	0.3	PERMANOVA	0.348	0.318621161627896	0.378561833527432
5	19826	Ekofisk_B-C_nb.l1.eu.dv	negbin	loge1	euclidean	varies	173	2	1000	999	999	721305647	12	10	22	0.4	PERMANOVA	0.614	0.582939577693356	0.644173492509539
6	19826	Ekofisk_B-C_nb.l1.eu.dv	negbin	loge1	euclidean	varies	173	2	1000	999	999	919635728	12	10	22	0.5	PERMANOVA	0.861	0.837643342953026	0.881529565271859
7	19826	Ekofisk_B-C_nb.l1.eu.dv	negbin	loge1	euclidean	varies	173	2	1000	999	999	782167509	12	10	22	0.6	PERMANOVA	0.965	0.951138565282994	0.975148499476566
8	19826	Ekofisk_B-C_nb.l1.eu.dv	negbin	loge1	euclidean	varies	173	2	1000	999	999	131726548	12	10	22	0.7	PERMANOVA	0.997	0.99048216034179	0.999224889959259
9	19826	Ekofisk_B-C_nb.l1.eu.dv	negbin	loge1	euclidean	varies	173	2	1000	999	999	396701845	12	10	22	0.8	PERMANOVA	1	0.995229270628373	1
10	19826	Ekofisk_B-C_nb.l1.eu.dv	negbin	loge1	euclidean	varies	173	2	1000	999	999	170231486	12	10	22	0.9	PERMANOVA	1	0.995229270628373	1
11	19826	Ekofisk_B-C_nb.l1.eu.dv	negbin	loge1	euclidean	varies	173	2	1000	999	999	189167425	12	10	22	1	PERMANOVA	1	0.995229270628373	1
1	19826	Ekofisk_B-C_nb.l1.eu.dv	negbin	loge1	euclidean	varies	173	2	1000	999	999	639561742	12	10	22	0	ANOSIM	0.044	0.0325082134598808	0.0591175271808763
2	19826	Ekofisk_B-C_nb.l1.eu.dv	negbin	loge1	euclidean	varies	173	2	1000	999	999	367534028	12	10	22	0.1	ANOSIM	0.076	0.0607005236213495	0.0946426879498649
3	19826	Ekofisk_B-C_nb.l1.eu.dv	negbin	loge1	euclidean	varies	173	2	1000	999	999	450236819	12	10	22	0.2	ANOSIM	0.167	0.144695979588768	0.191907577078948
4	19826	Ekofisk_B-C_nb.l1.eu.dv	negbin	loge1	euclidean	varies	173	2	1000	999	999	717045863	12	10	22	0.3	ANOSIM	0.349	0.319597674293691	0.379577525025511
5	19826	Ekofisk_B-C_nb.l1.eu.dv	negbin	loge1	euclidean	varies	173	2	1000	999	999	721305647	12	10	22	0.4	ANOSIM	0.56	0.5285608477393	0.590972492732871
6	19826	Ekofisk_B-C_nb.l1.eu.dv	negbin	loge1	euclidean	varies	173	2	1000	999	999	919635728	12	10	22	0.5	ANOSIM	0.809	0.782949748328689	0.832636930497458
7	19826	Ekofisk_B-C_nb.l1.eu.dv	negbin	loge1	euclidean	varies	173	2	1000	999	999	782167509	12	10	22	0.6	ANOSIM	0.95	0.934125167639916	0.962304535604417
8	19826	Ekofisk_B-C_nb.l1.eu.dv	negbin	loge1	euclidean	varies	173	2	1000	999	999	131726548	12	10	22	0.7	ANOSIM	0.985	0.974782543566305	0.99126675182535
9	19826	Ekofisk_B-C_nb.l1.eu.dv	negbin	loge1	euclidean	varies	173	2	1000	999	999	396701845	12	10	22	0.8	ANOSIM	0.999	0.993531214953175	0.999947797644557
10	19826	Ekofisk_B-C_nb.l1.eu.dv	negbin	loge1	euclidean	varies	173	2	1000	999	999	170231486	12	10	22	0.9	ANOSIM	1	0.995229270628373	1
11	19826	Ekofisk_B-C_nb.l1.eu.dv	negbin	loge1	euclidean	varies	173	2	1000	999	999	189167425	12	10	22	1	ANOSIM	1	0.995229270628373	1
1	19826	Ekofisk_B-C_nb.l1.eu.dv	negbin	loge1	euclidean	varies	173	2	1000	999	999	639561742	12	10	22	0	Mantel	0.051	0.0385654235184298	0.0669957870766927
2	19826	Ekofisk_B-C_nb.l1.eu.dv	negbin	loge1	euclidean	varies	173	2	1000	999	999	367534028	12	10	22	0.1	Mantel	0.07	0.0553300396668608	0.0880642687621321
3	19826	Ekofisk_B-C_nb.l1.eu.dv	negbin	loge1	euclidean	varies	173	2	1000	999	999	450236819	12	10	22	0.2	Mantel	0.164	0.141874054803732	0.188753358766176
4	19826	Ekofisk_B-C_nb.l1.eu.dv	negbin	loge1	euclidean	varies	173	2	1000	999	999	717045863	12	10	22	0.3	Mantel	0.347	0.317644791566362	0.377545999710198
5	19826	Ekofisk_B-C_nb.l1.eu.dv	negbin	loge1	euclidean	varies	173	2	1000	999	999	721305647	12	10	22	0.4	Mantel	0.583	0.55167620468219	0.613678180445242
6	19826	Ekofisk_B-C_nb.l1.eu.dv	negbin	loge1	euclidean	varies	173	2	1000	999	999	919635728	12	10	22	0.5	Mantel	0.829	0.803890912520722	0.851537310638291
7	19826	Ekofisk_B-C_nb.l1.eu.dv	negbin	loge1	euclidean	varies	173	2	1000	999	999	782167509	12	10	22	0.6	Mantel	0.954	0.938623728082788	0.965769204577198
8	19826	Ekofisk_B-C_nb.l1.eu.dv	negbin	loge1	euclidean	varies	173	2	1000	999	999	131726548	12	10	22	0.7	Mantel	0.992	0.983636793542192	0.996275484582141
9	19826	Ekofisk_B-C_nb.l1.eu.dv	negbin	loge1	euclidean	varies	173	2	1000	999	999	396701845	12	10	22	0.8	Mantel	0.999	0.993531214953175	0.999947797644557
10	19826	Ekofisk_B-C_nb.l1.eu.dv	negbin	loge1	euclidean	varies	173	2	1000	999	999	170231486	12	10	22	0.9	Mantel	1	0.995229270628373	1
11	19826	Ekofisk_B-C_nb.l1.eu.dv	negbin	loge1	euclidean	varies	173	2	1000	999	999	189167425	12	10	22	1	Mantel	1	0.995229270628373	1
1	19826	Ekofisk_B-C_nb.l1.eu.dv	negbin	loge1	euclidean	varies	173	2	1000	999	999	639561742	12	10	22	0	PERMDISP.c	0.07	0.0553300396668608	0.0880642687621321
2	19826	Ekofisk_B-C_nb.l1.eu.dv	negbin	loge1	euclidean	varies	173	2	1000	999	999	367534028	12	10	22	0.1	PERMDISP.c	0.067	0.0526570126559605	0.0847630772803126
3	19826	Ekofisk_B-C_nb.l1.eu.dv	negbin	loge1	euclidean	varies	173	2	1000	999	999	450236819	12	10	22	0.2	PERMDISP.c	0.059	0.0455736422141862	0.0759161314104837
4	19826	Ekofisk_B-C_nb.l1.eu.dv	negbin	loge1	euclidean	varies	173	2	1000	999	999	717045863	12	10	22	0.3	PERMDISP.c	0.06	0.0464552428152904	0.0770257361919663
5	19826	Ekofisk_B-C_nb.l1.eu.dv	negbin	loge1	euclidean	varies	173	2	1000	999	999	721305647	12	10	22	0.4	PERMDISP.c	0.073	0.0580113652070019	0.0913573223187132
6	19826	Ekofisk_B-C_nb.l1.eu.dv	negbin	loge1	euclidean	varies	173	2	1000	999	999	919635728	12	10	22	0.5	PERMDISP.c	0.073	0.0580113652070019	0.0913573223187132
7	19826	Ekofisk_B-C_nb.l1.eu.dv	negbin	loge1	euclidean	varies	173	2	1000	999	999	782167509	12	10	22	0.6	PERMDISP.c	0.066	0.0517679355653054	0.0836607869510158
8	19826	Ekofisk_B-C_nb.l1.eu.dv	negbin	loge1	euclidean	varies	173	2	1000	999	999	131726548	12	10	22	0.7	PERMDISP.c	0.063	0.0491067883940641	0.0803479584937482
9	19826	Ekofisk_B-C_nb.l1.eu.dv	negbin	loge1	euclidean	varies	173	2	1000	999	999	396701845	12	10	22	0.8	PERMDISP.c	0.09	0.0733421148024408	0.109883768962419
10	19826	Ekofisk_B-C_nb.l1.eu.dv	negbin	loge1	euclidean	varies	173	2	1000	999	999	170231486	12	10	22	0.9	PERMDISP.c	0.098	0.080625513651916	0.1185342326441
11	19826	Ekofisk_B-C_nb.l1.eu.dv	negbin	loge1	euclidean	varies	173	2	1000	999	999	189167425	12	10	22	1	PERMDISP.c	0.142	0.121267539170788	0.165535497356321
1	19826	Ekofisk_B-C_nb.l1.eu.dv	negbin	loge1	euclidean	varies	173	2	1000	999	999	639561742	12	10	22	0	PERMDISP.p	0.056	0.0429359633298024	0.0725803611158302
2	19826	Ekofisk_B-C_nb.l1.eu.dv	negbin	loge1	euclidean	varies	173	2	1000	999	999	367534028	12	10	22	0.1	PERMDISP.p	0.051	0.0385654235184298	0.0669957870766927
3	19826	Ekofisk_B-C_nb.l1.eu.dv	negbin	loge1	euclidean	varies	173	2	1000	999	999	450236819	12	10	22	0.2	PERMDISP.p	0.042	0.0307926927470613	0.0568519423744529
4	19826	Ekofisk_B-C_nb.l1.eu.dv	negbin	loge1	euclidean	varies	173	2	1000	999	999	717045863	12	10	22	0.3	PERMDISP.p	0.05	0.0376954643955834	0.0658748323600843
5	19826	Ekofisk_B-C_nb.l1.eu.dv	negbin	loge1	euclidean	varies	173	2	1000	999	999	721305647	12	10	22	0.4	PERMDISP.p	0.058	0.0446932097626804	0.074805385528559
6	19826	Ekofisk_B-C_nb.l1.eu.dv	negbin	loge1	euclidean	varies	173	2	1000	999	999	919635728	12	10	22	0.5	PERMDISP.p	0.055	0.0420592094872731	0.0714660249638561
7	19826	Ekofisk_B-C_nb.l1.eu.dv	negbin	loge1	euclidean	varies	173	2	1000	999	999	782167509	12	10	22	0.6	PERMDISP.p	0.053	0.0403096011198777	0.0692335510980822
8	19826	Ekofisk_B-C_nb.l1.eu.dv	negbin	loge1	euclidean	varies	173	2	1000	999	999	131726548	12	10	22	0.7	PERMDISP.p	0.049	0.036826978395879	0.0647524449999018
9	19826	Ekofisk_B-C_nb.l1.eu.dv	negbin	loge1	euclidean	varies	173	2	1000	999	999	396701845	12	10	22	0.8	PERMDISP.p	0.075	0.059803293995141	0.0935483943328867
10	19826	Ekofisk_B-C_nb.l1.eu.dv	negbin	loge1	euclidean	varies	173	2	1000	999	999	170231486	12	10	22	0.9	PERMDISP.p	0.076	0.0607005236213495	0.0946426879498649
11	19826	Ekofisk_B-C_nb.l1.eu.dv	negbin	loge1	euclidean	varies	173	2	1000	999	999	189167425	12	10	22	1	PERMDISP.p	0.114	0.0953009478794267	0.135727945501814
